# Supplementary material
Source: PubMed Central journal article supplement (PMC3145694)
Supplement: 1109539108_Appendix.pdf [file 1109539108_Appendix.pdf]

## **Supporting Information**

### **Table of Contents**

#### **Supplementary Methods**

#### **Supplementary Tables**

**Table S1:** Primers used in this study.

#### **Supplementary Figures**

**Fig. S1:** Inactivation of *pacB* in *S. coeruleorubidus*.

**Fig. S2:** SDS-PAGE analysis of the *E. coli* purified PacB.

**Fig. S3:** HR-MS and HR-MS/MS of **1** measured during LC-MS.

**Fig. S4:** HR-MS and HR-MS/MS of **2** measured during LC-MS.

**Fig. S5:** HR-MS and HR-MS/MS of **3** measured during LC-MS.

**Fig. S6:** HR-MS and HR-MS/MS of **4** measured during LC-MS.

**Fig. S7:** FTMS and Ppant ejection analysis of the *in vitro* reaction generating PacH-bound Ala<sub>1</sub>-*m*Tyr<sub>2</sub>-DABA<sub>3</sub>-Ala<sub>4</sub>-CO-*m*Tyr<sub>5</sub>.

**Fig. S8:** FTMS and Ppant ejection analysis of the *in vitro* reaction generating Ala<sub>1</sub>-*m*Tyr<sub>2</sub>-DABA<sub>3</sub>-S-PacH.

**Fig. S9:** MS/MS analysis of Ala<sub>1</sub>-*m*Tyr<sub>2</sub>-DABA<sub>3</sub>-Pant ion in Ppant ejection assay.

**Fig. S10:** FTMS and Ppant ejection analysis of the *in vitro* reaction generating *m*Tyr<sub>2</sub>-DABA<sub>3</sub>-S-PacH without tRNA.

**Fig. S11:** Three-dimensional structural model of PacB in comparison to the reported structure of FemX.

**Fig. S12:** Sequence alignment of PacB and FemX of *W. viridescens* by ClustalW analysis.

#### **References**

## Supplementary Methods

**Pacidamycin production and isolation.** For PacB gene deletion experiment, two mutants were selected for pacidamycin production analysis after PCR verification (primers listed in table S1). Wild-type *S. coeruleorubidus* was grown side by side as controls with all of the mutants. Starter cultures in TSB medium were inoculated with spores and incubated at 30 °C, 200 rpm for 24 h. Production medium (20 mL; 20.99 g/L MOPS, 10 g/L lactose, 4.41 g/L K<sub>2</sub>HPO<sub>4</sub>, 2.14 g/L NH<sub>4</sub>Cl, 0.6 g/L MgSO<sub>4</sub>, 10 mg/L FeSO<sub>4</sub>·2H<sub>2</sub>O, 10 mg/L MnCl<sub>2</sub>·4H<sub>2</sub>O, 10 mg/L ZnSO<sub>4</sub>·7H<sub>2</sub>O, 10 mg/L CaCl<sub>2</sub>, pH 7.0) was inoculated with starter culture (0.5 mL) and incubated at 30 °C, 200 rpm for 5 d. Pacidamycins were extracted from the cell-free broth (10 mL) using XAD-16 resin (5% v/v). The resin was washed with water (20 mL) and the extract was eluted with methanol (5 mL). The solvent was removed by a rotary evaporator and the residue was redissolved in water/methanol 1:1 (500 µL) and subjected to LC-HRMS analysis (25 µL injection).

**Cloning, Overexpression and Purification of Proteins.** Cloning, expression, and purification of PacDHIJLNOPW have been reported previously (1). *pacB* was PCR amplified from genomic DNA and ligated to pET-30 Xa/LIC (Novagen) following the standard protocol and confirmed by DNA sequencing. The resulting expression construct was transformed into *E. coli* BL21 for protein expression. In 1 L of liquid culture, the cells were grown at 37 °C in LB medium with 50 µg/mL kanamycin to an OD<sub>600</sub> of 0.4. The cells were cooled on ice for 10 min and then induced with 0.1 mM isopropyl-β-D-thiogalactopyranoside (IPTG) for 16 h at 16 °C. The cells were harvested by centrifugation (6000 rpm, 6 min, 4 °C), resuspended in 30 mL lysis buffer (25 mM HEPES pH 8.0, 0.5 M NaCl, 5 mM imidazole) and lysed by sonication on ice. Cellular debris was removed by ultracentrifugation (35000 rpm, 35 min, 4 °C). Ni-NTA agarose resin was added to the supernatant (2 mL/L of culture) and the solution was nutated at 4 °C for 1 h. The protein resin mixture was loaded into a gravity flow column, and proteins were eluted with increasing concentrations of imidazole in Buffer A (50 mM HEPES, pH 8.0, 1 mM EDTA). Purified proteins were concentrated and buffer exchanged into Buffer A + 10% glycerol using Amicon Ultra filters. The final proteins were flash-frozen in liquid nitrogen and stored at -80 °C.

### Supplementary Table

**Table S1.** Primers used in this study.

| <b>Primer</b> | <b>Sequence</b>                                                        | <b>Note</b>                                                                              |
|---------------|------------------------------------------------------------------------|------------------------------------------------------------------------------------------|
| mPacB_F       | 5'-AAAACCGCCCTTGCCCGCGG-3'                                             | Used for $\Delta pacB$ mutant construction; mPacB_F is also used for mutant verification |
| mPacB_R       | 5'-AACCGGATCCGGTAGGACAG-3'                                             |                                                                                          |
| mPacBap_F     | 5'-CTCGCTGGTTGGACACTAGATCATGAGGGCTGATACatgATT<br>CCGGGGATCCGTCGACC -3' |                                                                                          |
| mPacBap_R     | 5'-CCCGGTGGCTGCCGGCGGGTACCAGCCGCCTCCCTCttaTGT<br>AGGCTGGAGCTGCTTC-3'   |                                                                                          |
| Apra_i        | 5'-AGTTGTCTCTGACACATTCT-3'                                             | Internal primer for mutant verification                                                  |
| PacB_PET30F   | 5'-GGTATTGAGGGTCGCATGGCTATTGGTTTTACCTC-3'                              | Used for PacB expression                                                                 |
| PacB_PET30R   | 5'-AGAGGAGAGTTAGAGCCTTATGATTCGCTACAGGCAA-3'                            |                                                                                          |

**Supplementary Figures**

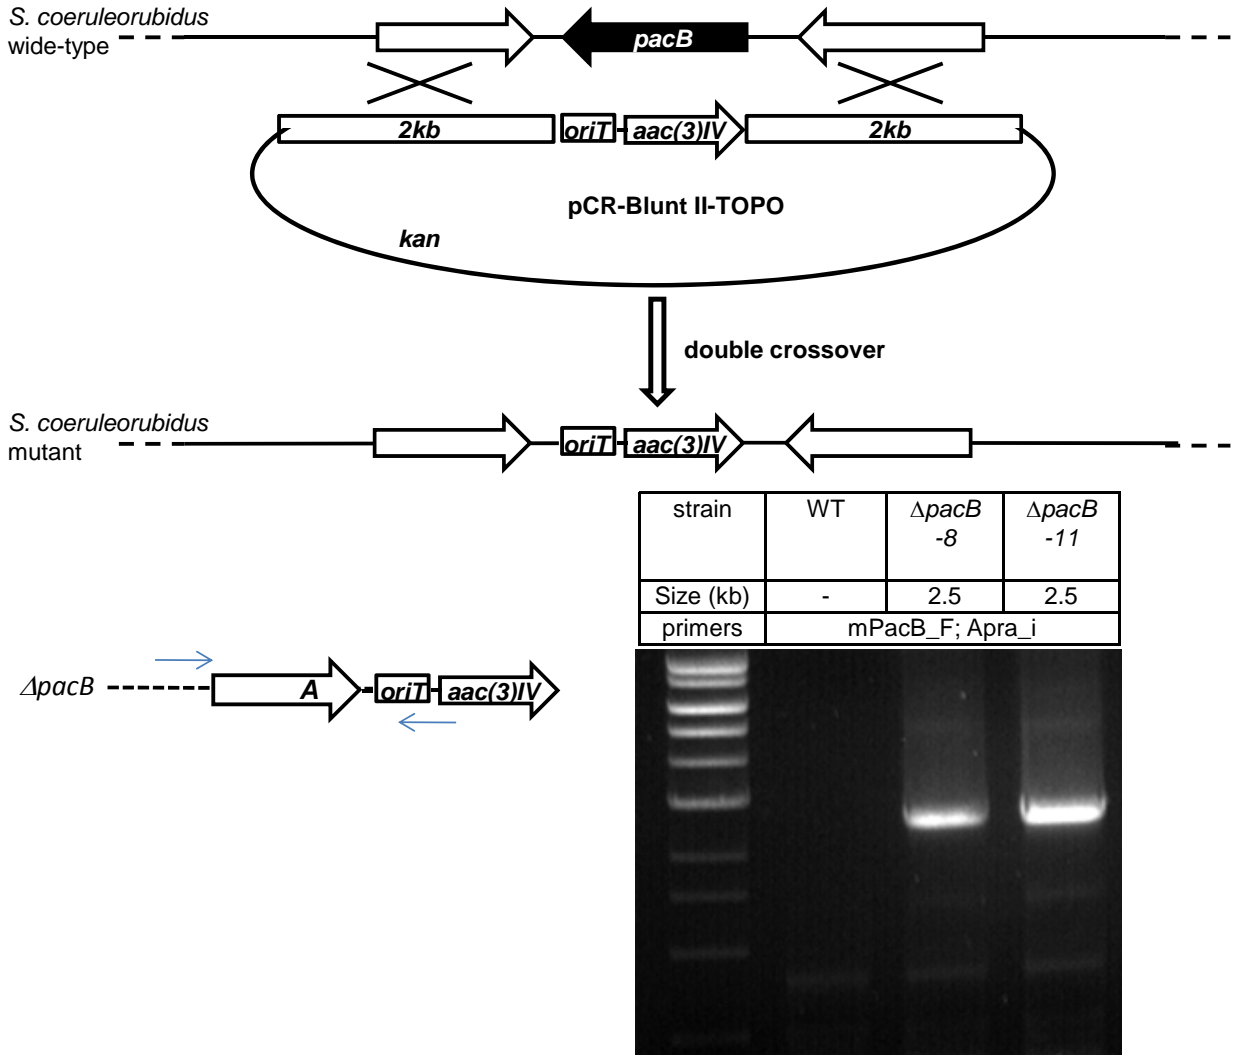

**Fig. S1.** Inactivation of *pacB* in *S. coeruleorubidus*. *pacB* was deleted in-frame by homologous recombination as illustrated above. The genomic DNA of wide-type and two  $\Delta pacB$  mutant strains was extracted and used as templates for subsequent PCR verification of mutants. PCR was carried out using one internal primer from *acc(3)IV-oriT* cassette and one external primer (Table S1). The size of PCR products was consistent with the expected size of  $\Delta pacB$  mutant.

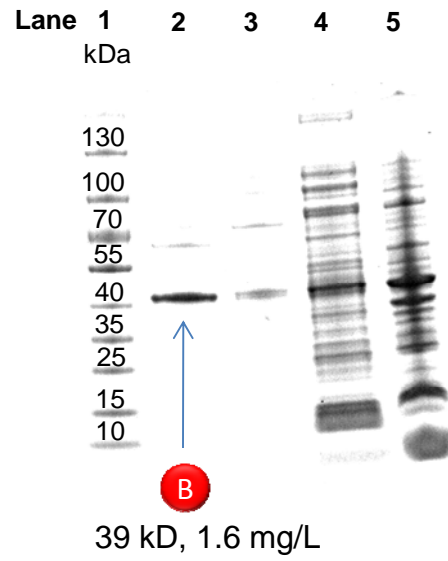

**Fig. S2.** SDS-PAGE analysis of the *E. coli* purified PacB. Lane 1: Ladder; Lane 2: Elution; Lane 3: Wash; Lane 4: Flowthrough; Lane 5: insoluble pellet.

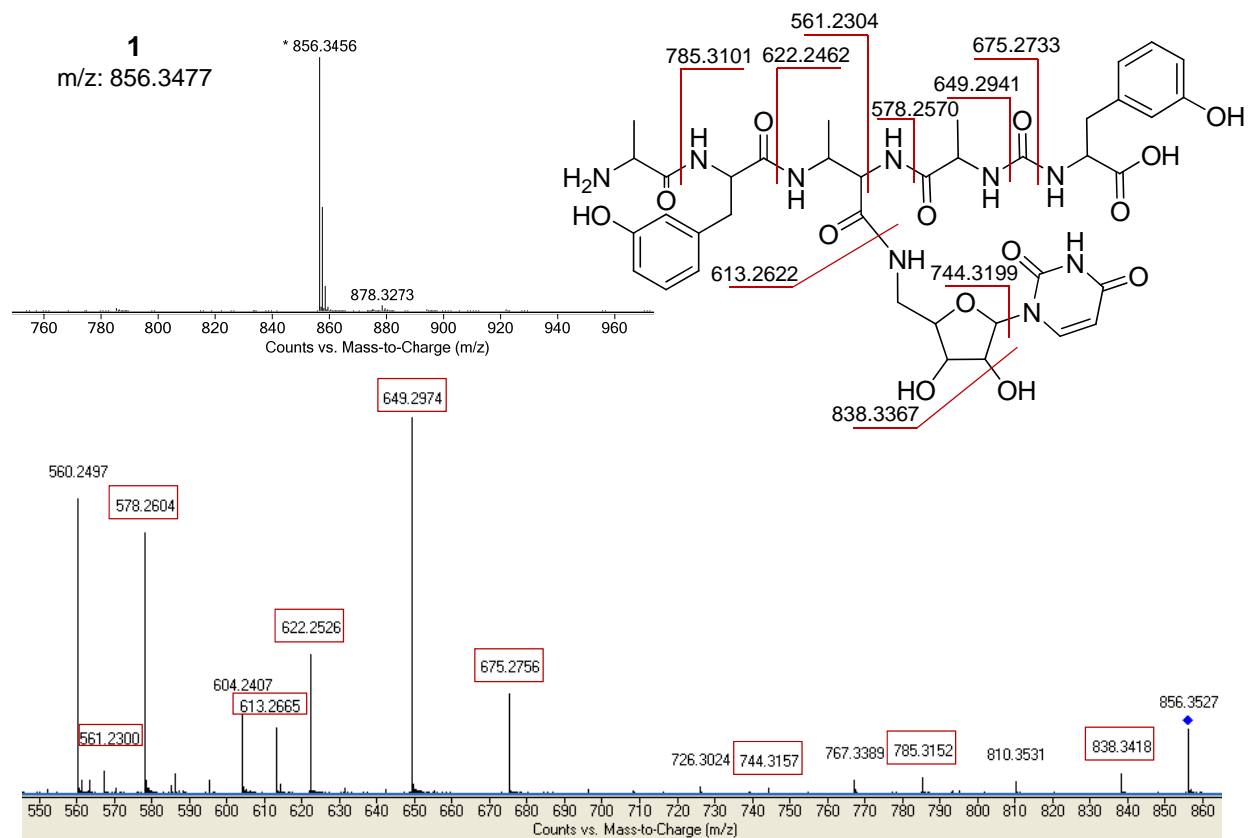

**Fig. S3.** HR-MS and HR-MS/MS of **1** measured during LC-MS.

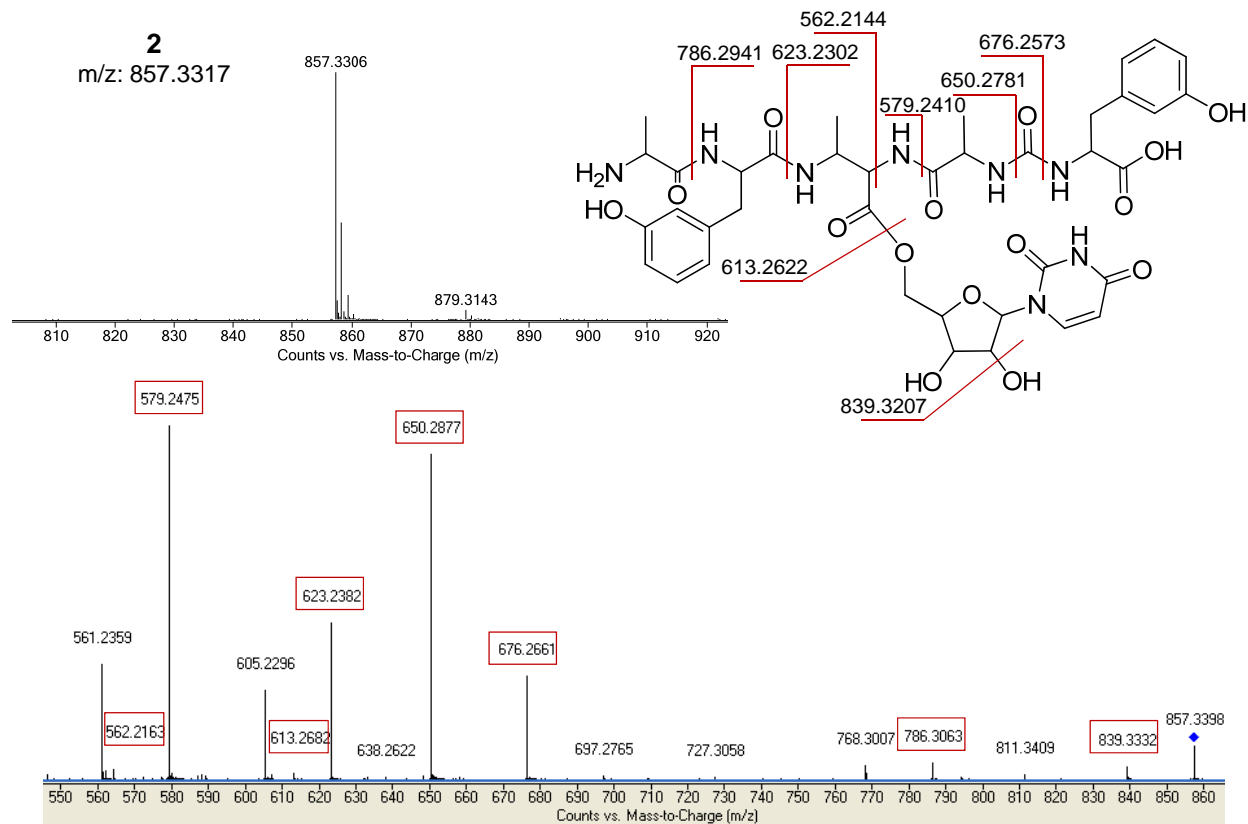

**Fig. S4.** HR-MS and HR-MS/MS of **2** measured during LC-MS.

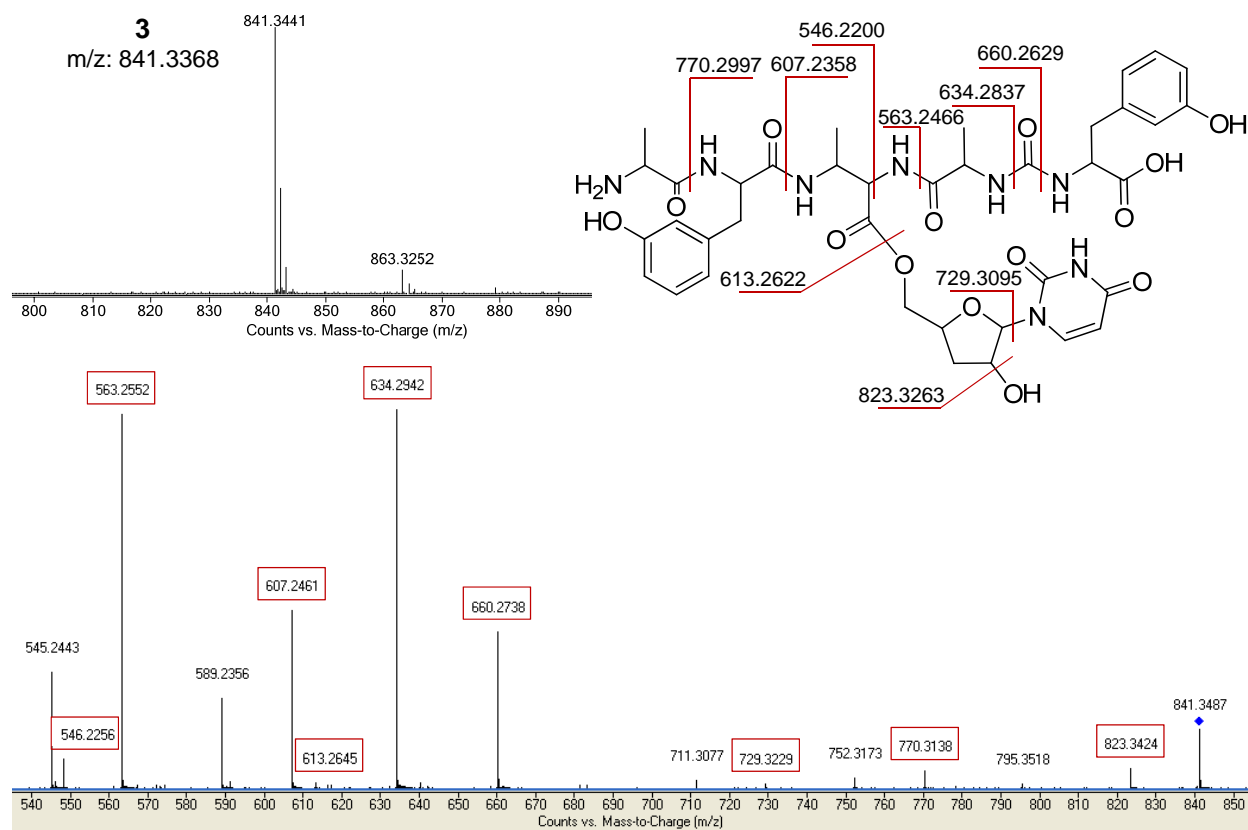

**Fig. S5.** HR-MS and HR-MS/MS of **3** measured during LC-MS.



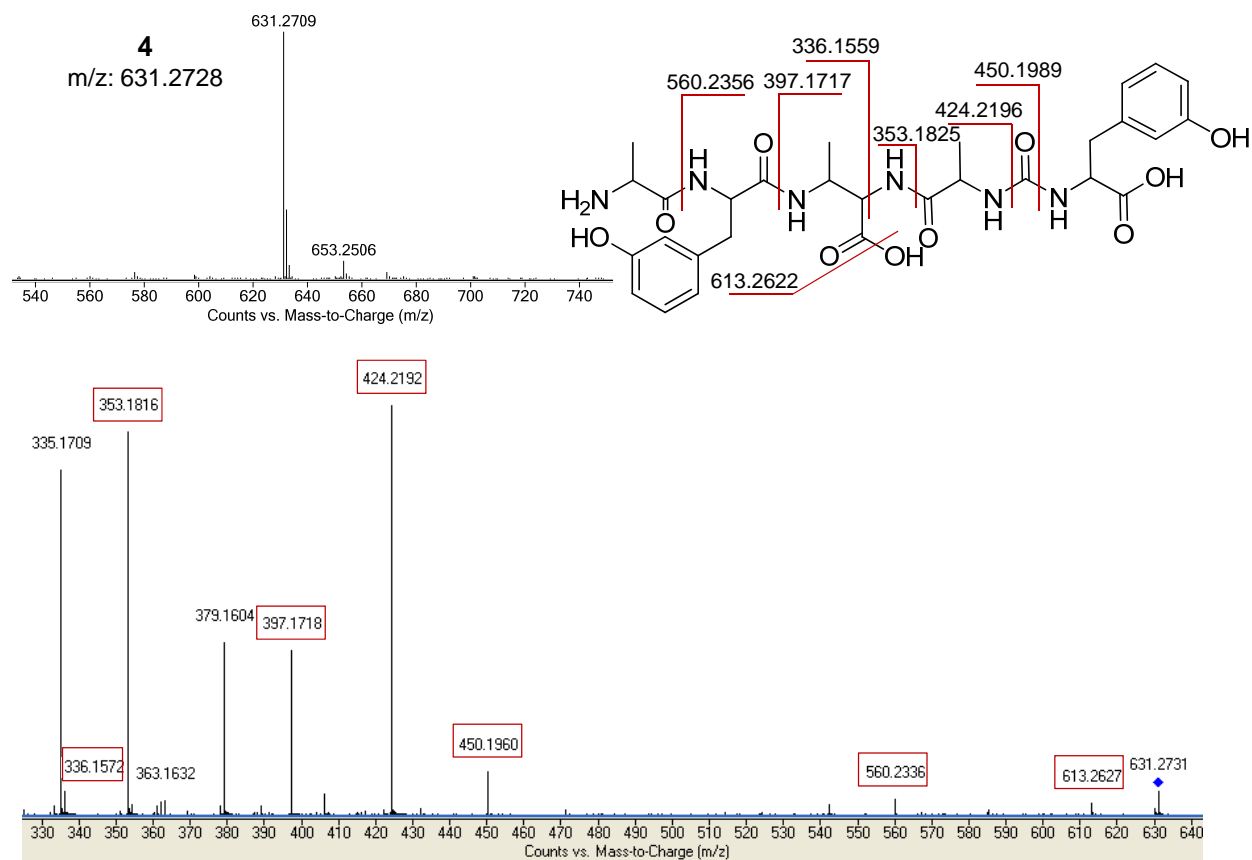

**Fig. S6.** HR-MS and HR-MS/MS of **4** measured during LC-MS.

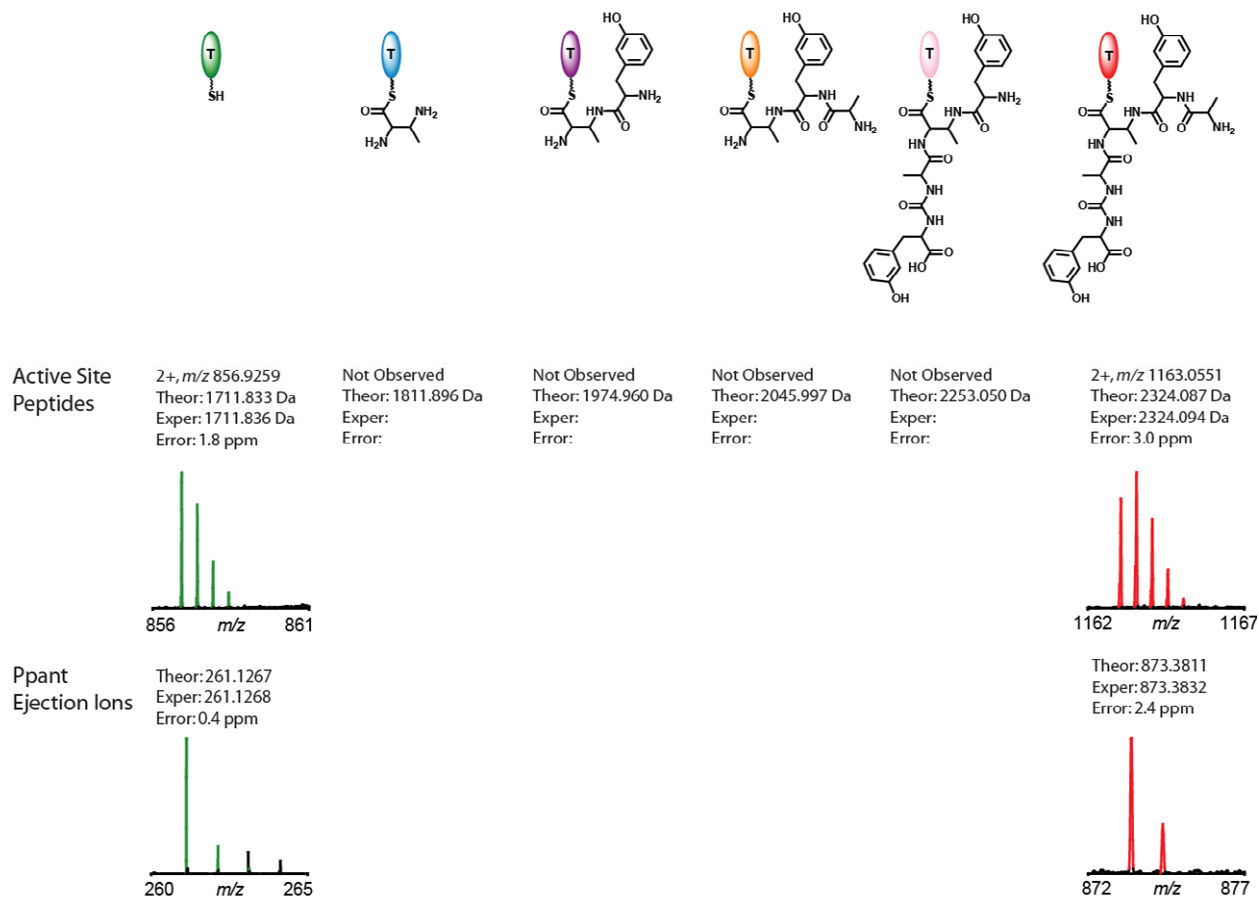

**Fig. S7.** FTMS and Ppant ejection analysis of the *in vitro* reaction generating PacH-bound Ala<sub>1</sub>-*m*Tyr<sub>2</sub>-DABA<sub>3</sub>-Ala<sub>4</sub>-CO-*m*Tyr<sub>5</sub>. Enzymes and substrates: PacBDHJLNOPW, aatRS, tRNA, DABA, *m*-Tyr, Ala, ATP.

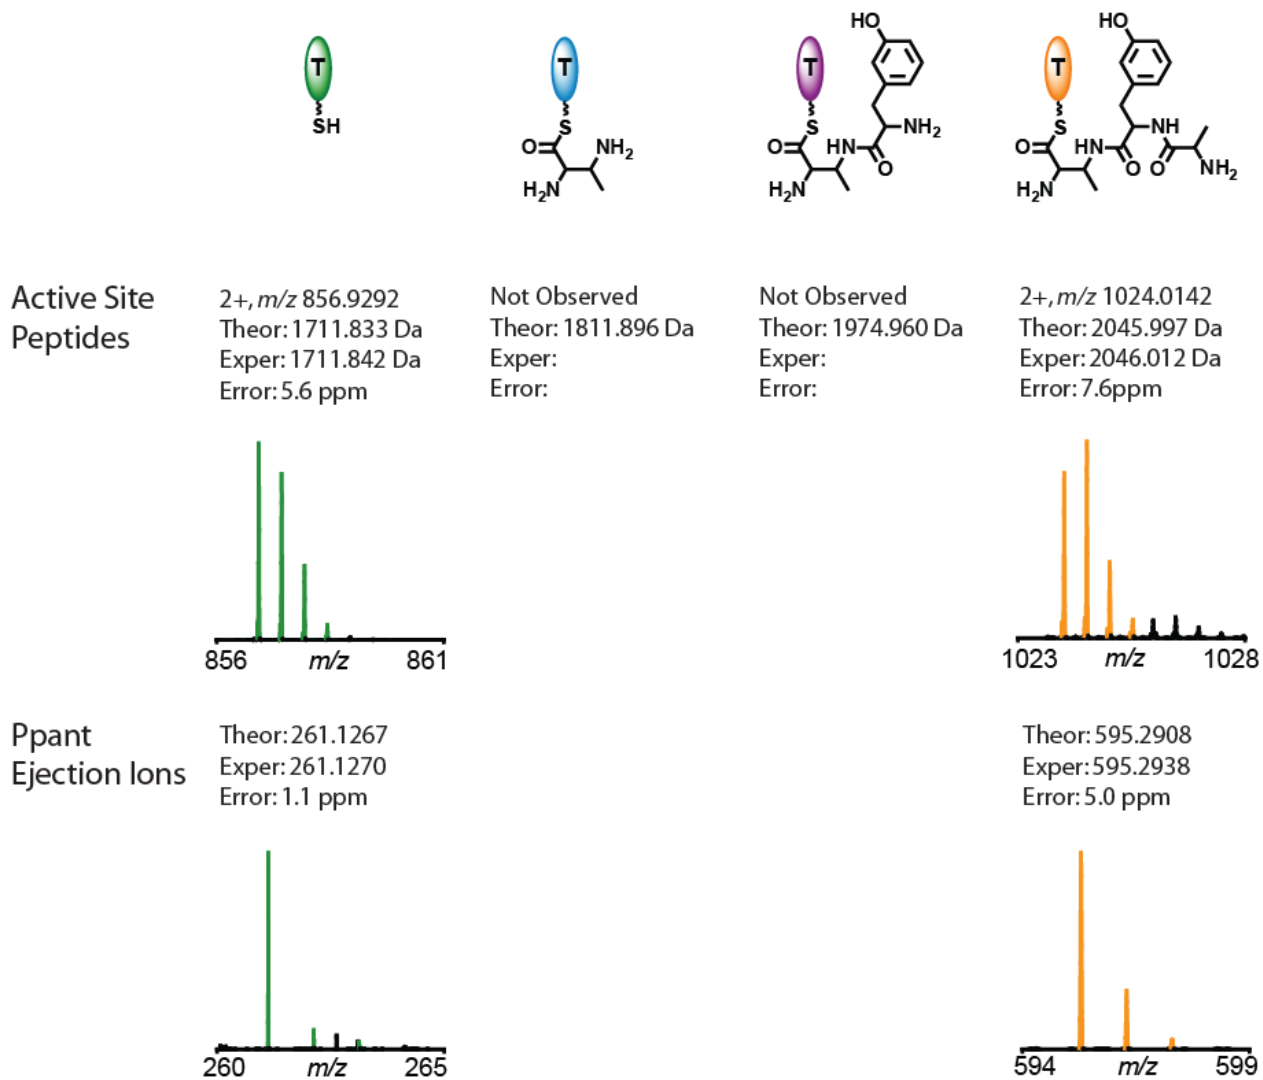

**Fig. S8.** FTMS and Ppant ejection analysis of the *in vitro* reaction generating Ala<sub>1</sub>-*m*Tyr<sub>2</sub>-DABA<sub>3</sub>-S-PacH. Enzymes and substrates: PacBHPW, aatRS, tRNA, DABA, *m*-Tyr, Ala, ATP.

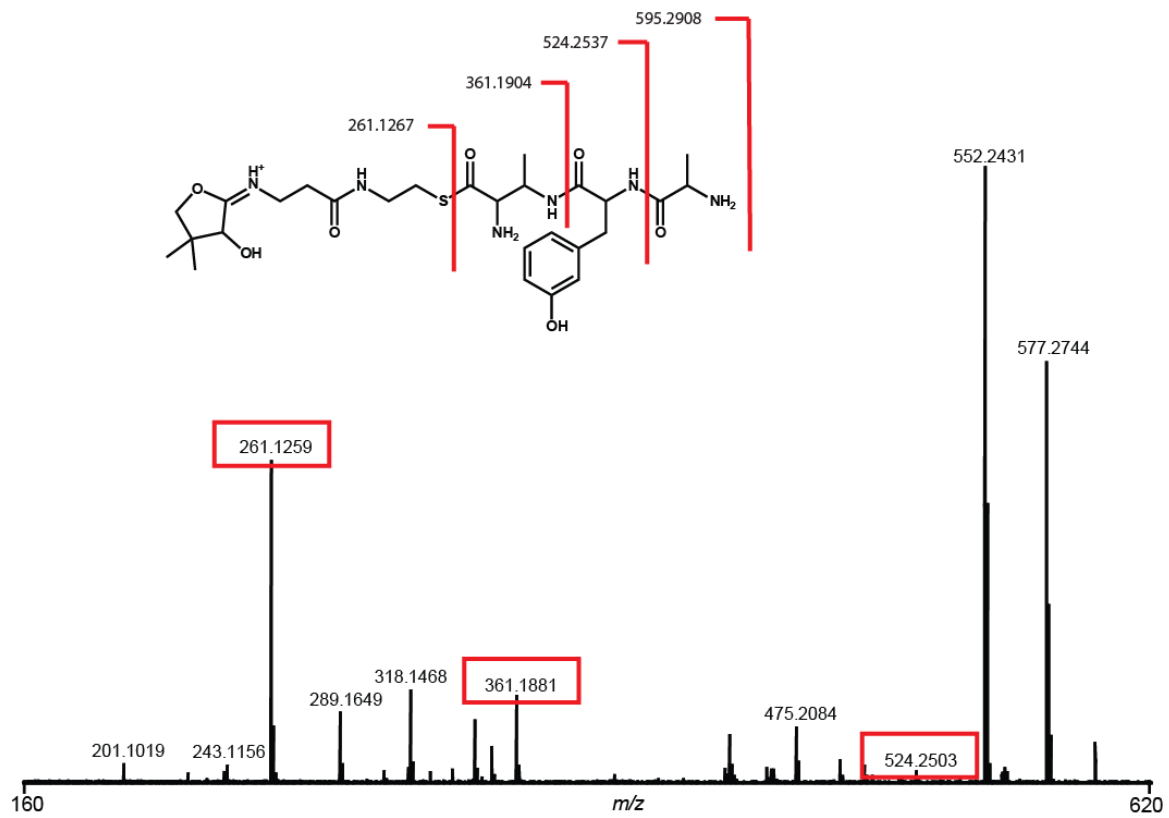

**Fig. S9.** MS/MS analysis of Ala<sub>1</sub>-mTyr<sub>2</sub>-DABA<sub>3</sub>-Pant ion in Ppant ejection assay.

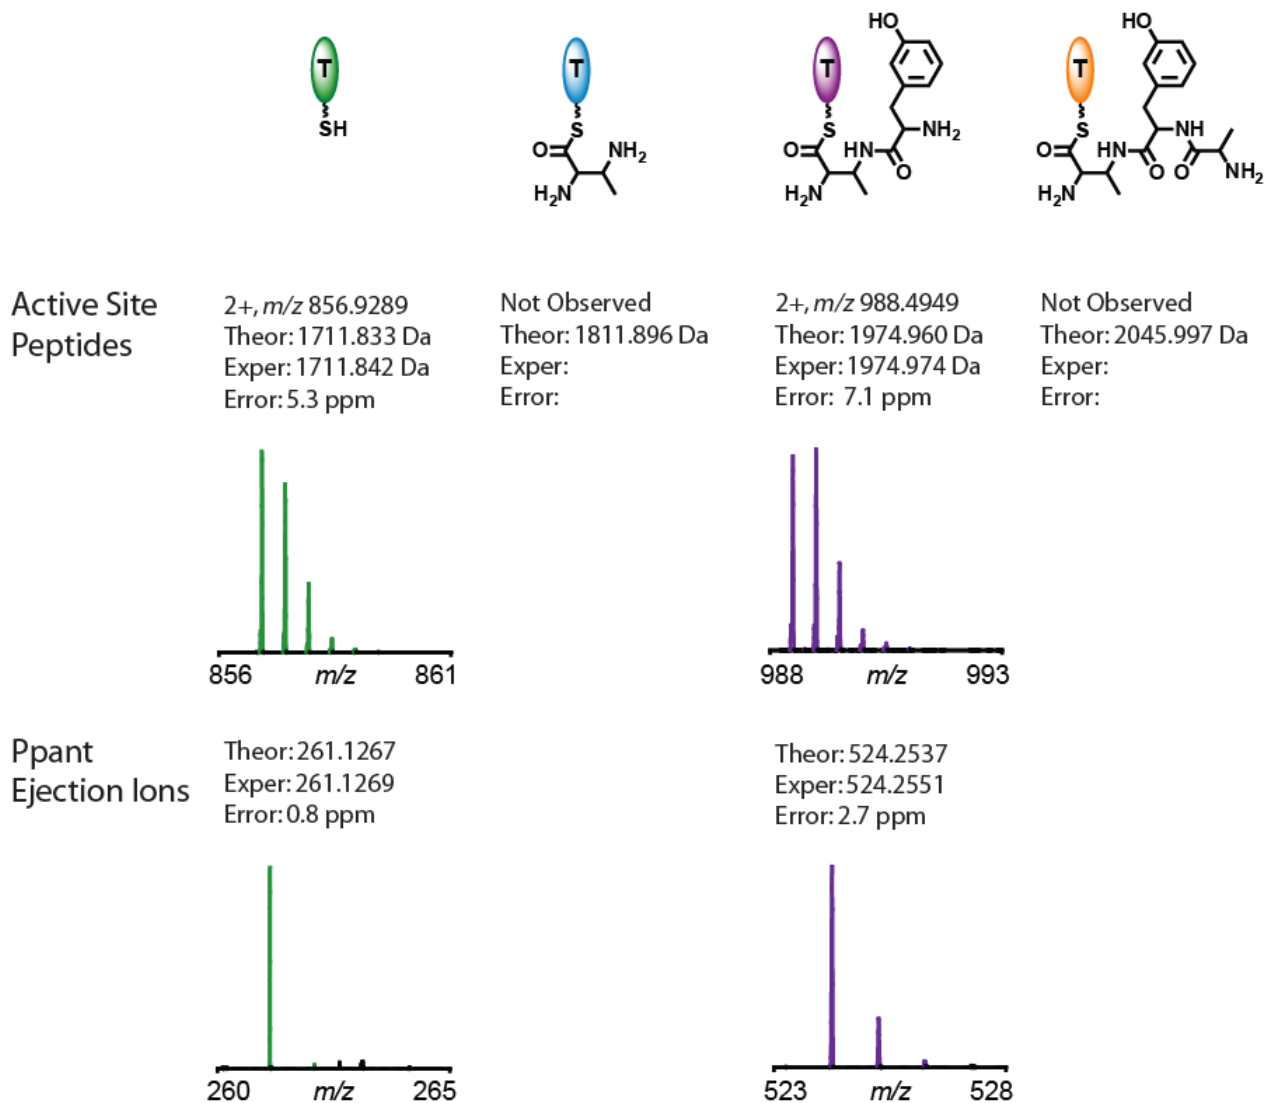

**Fig. S10.** FTMS and Ppant ejection analysis of the *in vitro* reaction generating  $m\text{Tyr}_2\text{-DABA}_3\text{-S-PacH}$  without tRNA. Enzymes and substrates: PacBHPW, aaRS, DABA, *m*-Tyr, Ala, ATP.

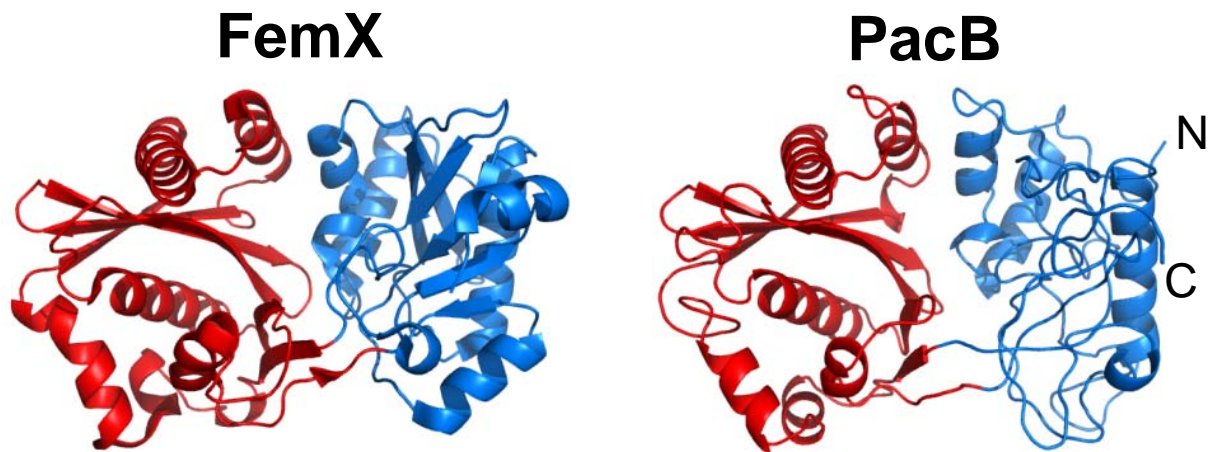

**Fig. S11.** Three-dimensional structural model of PacB in comparison to the reported structure of FemX (PDB ID 3GKR). Domain 1 is represented in blue and domain 2 in red. FemX domain 1: residues 1-145 and 317-335, FemX domain 2: residues 146-316. PacB domain 1: residues 1-164 and 332-350, PacB domain 2: residues 165-331.

```

      1           10           20           30           40           50
FemX  . . . . .MPV LNLND . . . . .PQ AVER YEEFM RQSPY G. QVTQD LGW AKVKNNW EPVD VYLEDD QGAI
PacB  MAIGFTSA IADFDQKQFDALD TTAG AASA YSR LRQHE QDARW TSR YLGW FGDGDEVR AAI PVY RYRMR SWP

      60           70           80           90           100          110          120
FemX  IAAMSMLLGDTPTDKKFAYASKGPVMDVTDV D LLDRLVDEAVKALDGRAYV LRFDP EVAY SDEFNTTLQD
PacB  DPSYDPRSWG L PDGIAEECS PRAS LMVGGC IDRRRTGFHVD AEARTPR ELQR L LVEI AKHA ADE DMCLTFP

      130          140          150          160          170          180          190
FemX  HG YVTRNRNVADAGMHA TIQPR LNMVLD LTKFP DAKT TLDLYP SKTKS KIKRPF RDG VEV HSGNS ATELD
PacB  YM YADAQSALAAATDDR IVWAE LAR EAH LFGLS DAQWESS LS . AKIRY RLRQDQRKI AAV PMTVG EVSWP

      200          210          220          230          240          250
FemX  E FFKTY TTMAER HGI THRP I EYF QRM QAAFD . . . . A DTMRI FV AERE GK LLS TG IAL KYGRK I WMYM AG
PacB  E VDTWA SELI SHN ASKGAHEHP E FV SFR YSGWQDN P DI DLMAF TARSAG LRGV E TIL LWENE L E VY E VC

      260          270          280          290          300          310          320
FemX  SMDGN TYYAPYAVQSEMIQWALD TNDLYD LGG I ESE STDD SLYVFKH V FVKDAPRE Y IGEI DKVLDPEV
PacB  . M TGEESD ER FAL YLNL L FHLPI QYARARG IDH IRLG S KAE TPKALRG AAFEN . . . L Y GVL SRAETKRL

      330
FemX  YAELVKD
PacB  ACSSES . .

```

**Fig. S12.** Sequence alignment of PacB and FemX of *W. viridescens* by ClustalW analysis (2).

## References

1. Zhang W, *et al.* (2011) Nine enzymes are required for assembly of the pacidamycin group of peptidyl nucleoside antibiotics. *J Am Chem Soc* 133:5240-5243.
2. Larkin MA, *et al.* (2007) Clustal W and Clustal X version 2.0. *Bioinformatics* 23:2947-2948.
